# Supplementary material for: Constructing multi-functional composite separator of PVDF-HFP/h-BN supported Co-CNF membrane for lithium–sulfur batteries
Source: Royal Society of Chemistry journal article supplement (doi:10.1039/d1se01666k), 2021-12-07
Supplement: d1se01666k1.pdf [file d1se01666k1.pdf]

## Supporting Information

### **Constructing Multi-functional Composite Separator of PVDF- HFP/h-BN supported Co-CNF membrane for Lithium-Sulfur Batteries**

Xin Liang<sup>a,b</sup>, Lulu Wang<sup>a</sup>, Yang Wang<sup>a</sup>, Yongchao Liu<sup>a</sup>, Yi Sun<sup>a</sup>, and Hongfa  
Xiang<sup>a\*</sup>

<sup>a</sup>School of Materials Science and Engineering, Engineering Research Center of High-  
Performance Copper Alloy Materials and Processing, Ministry of Education, Hefei  
University of Technology, Hefei 230009, Anhui, China.

<sup>b</sup>School of Energy Materials and Chemical Engineering, Hefei University, Hefei  
230601, Anhui, China.

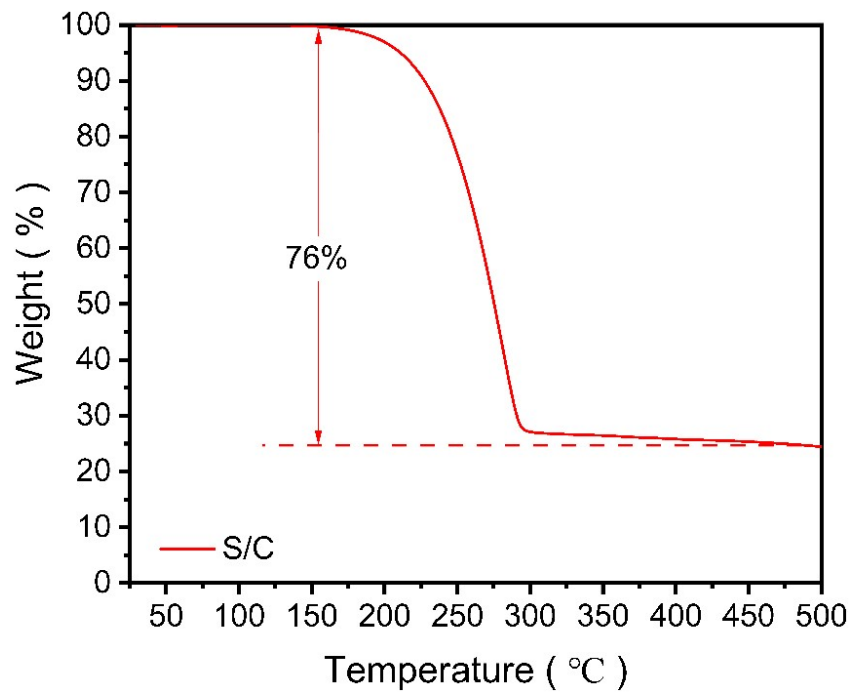

Figure S1. TGA curve for S/C composite.

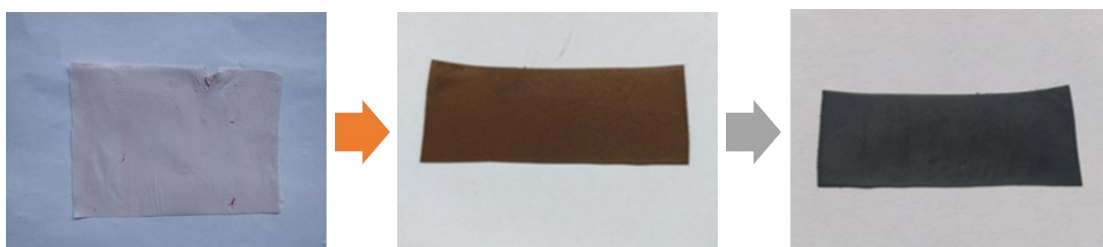

Figure S2. The photographs of the membrane after electrospun, presinter and further carbonization.

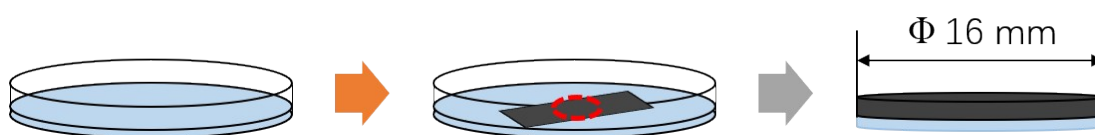

Figure S3. Schematic diagrams of the synthetic procedure of PHB/Co-CNF.

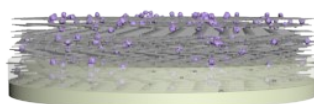

Figure S4. Schematic diagram of PHB/Co-CNF.

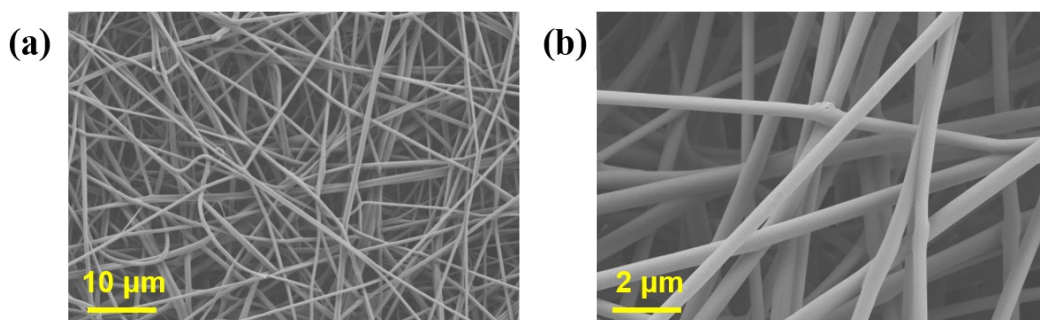

Figure S5. SEM images of PAN/Co(NO<sub>3</sub>)<sub>2</sub> at different magnification: (a) 1000 times and (b) 5000 times.

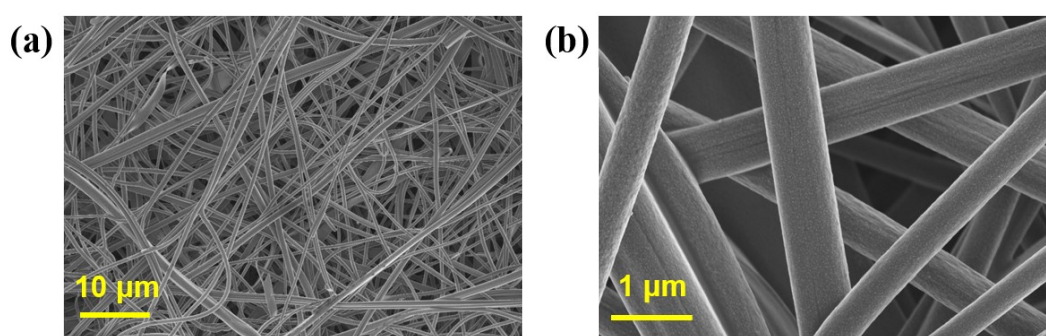

Figure S6. SEM images of Co-CNF at different magnification: (a) 1000 times and (b) 10000 times.

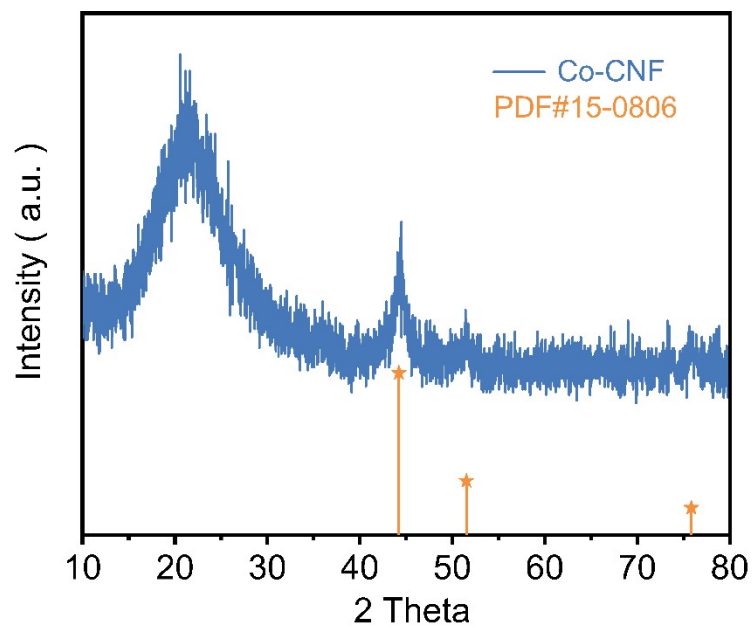

Figure S7. XRD pattern of the as-prepared Co-CNF.

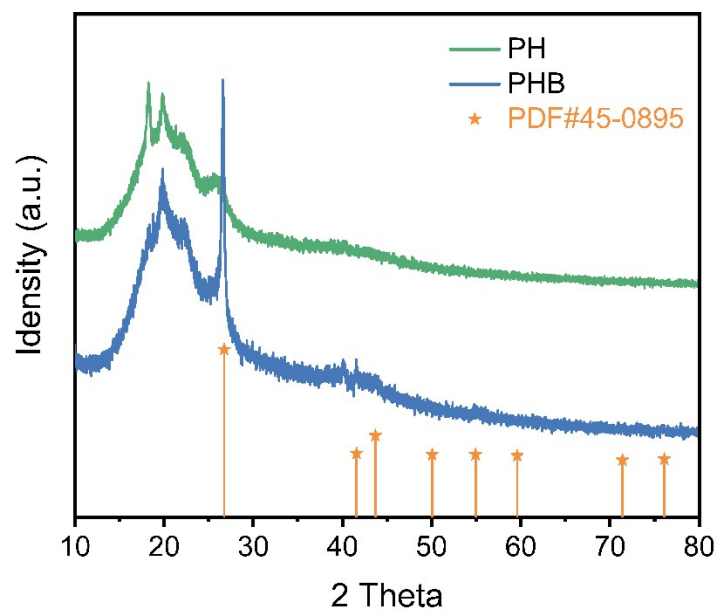

Figure S8. XRD patterns of PH and PHB.

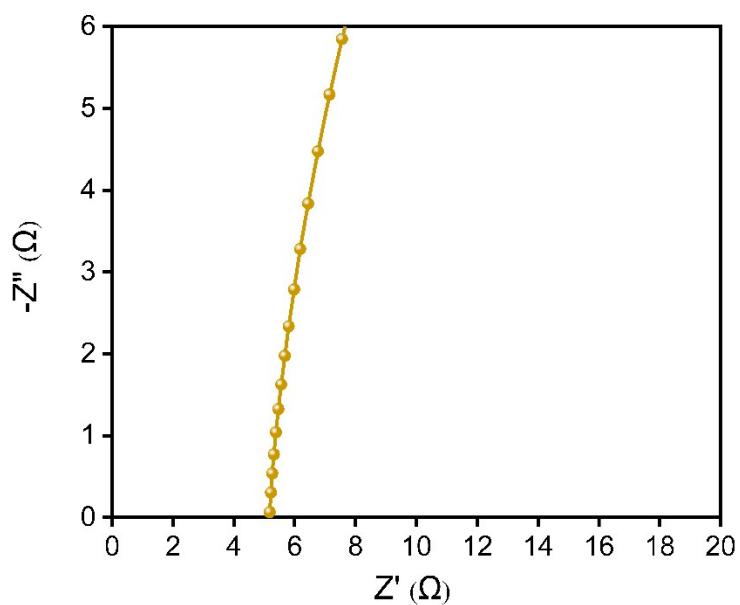

Figure S9. Nyquist plot of PHB/Co-CNF after absorbing electrolyte.

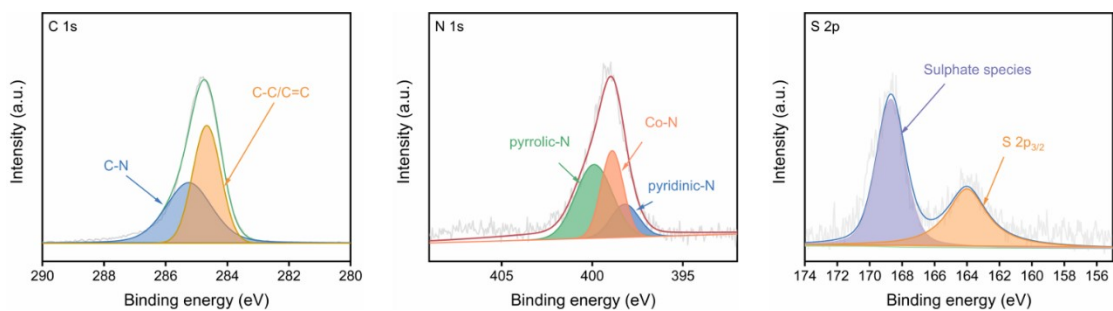

Figure S10. C, N, S XPS spectrum of PHB/Co-CNF after polysulfide diffusion test.

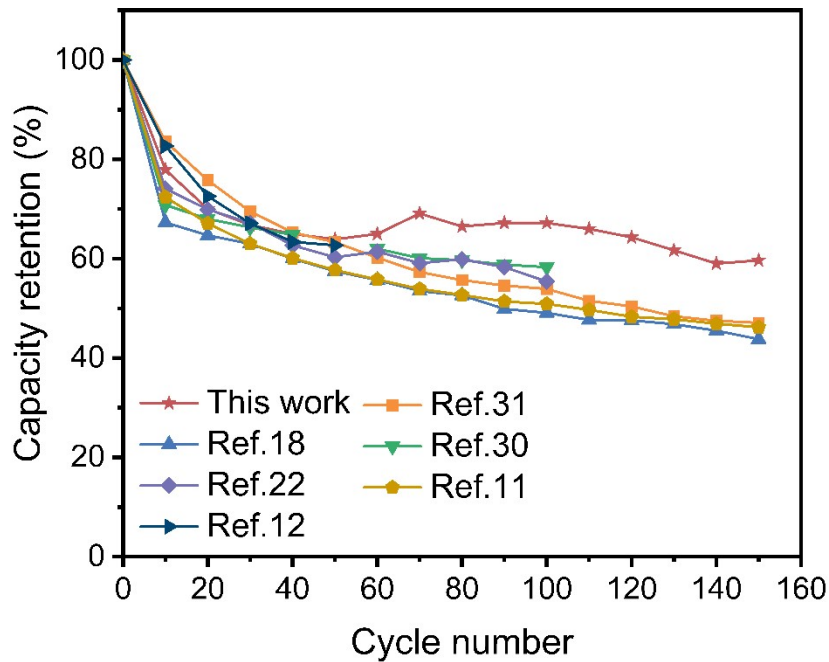

Figure S11. C, N, S XPS spectrum of PHB/Co-CNF after polysulfide diffusion test.

Table S1. Comparisons with recent reported works on Li-S batteries with different separators.

| Separator                                 | Discharge capacity at 1st cycle ( $\text{mAh g}^{-1}$ ) | Discharge capacity at 100th cycle ( $\text{mAh g}^{-1}$ ) | Retention after 100 cycles (%) | Rate (C) | Ref.      |
|-------------------------------------------|---------------------------------------------------------|-----------------------------------------------------------|--------------------------------|----------|-----------|
| PP/NbN                                    | 1277.5                                                  | 650.6                                                     | 50.9                           | 0.2      | 9         |
| Celgard 3501                              | 1131                                                    | 690 (50 cycles)                                           | 67.2                           | -        | 10        |
| glass fiber  <br>oPANVP/SnCl <sub>2</sub> | 1030                                                    | 700                                                       | 49.1                           | 0.5      | 19        |
| Celgard-<br>NSPCFS@CoS <sub>2</sub>       | 1140.7                                                  | 631.6                                                     | 55.4                           | 0.5      | 23        |
| PP/C-C-N-Co                               | 1320                                                    | 787                                                       | 58.3                           | 0.5      | 34        |
| PP/BNCNF                                  | 972.4                                                   | 833.6                                                     | 53.9                           | 0.3      | 35        |
| PHB/Co-CNF                                | 949.6                                                   | 638.3                                                     | 67.2                           | 0.5      | This work |

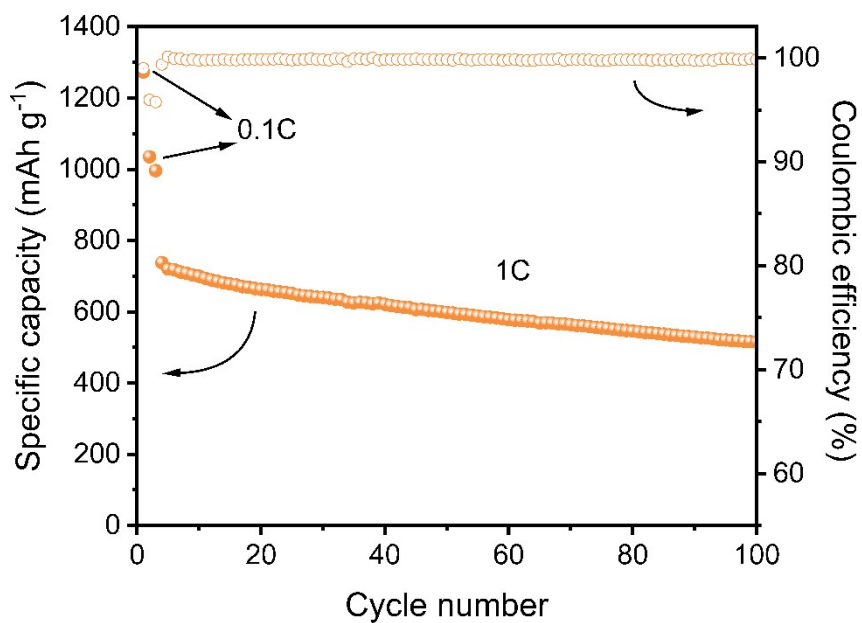

Figure S12. Cycling performance of the Li-S battery with PHB/Co-CNF separator at 1 C.

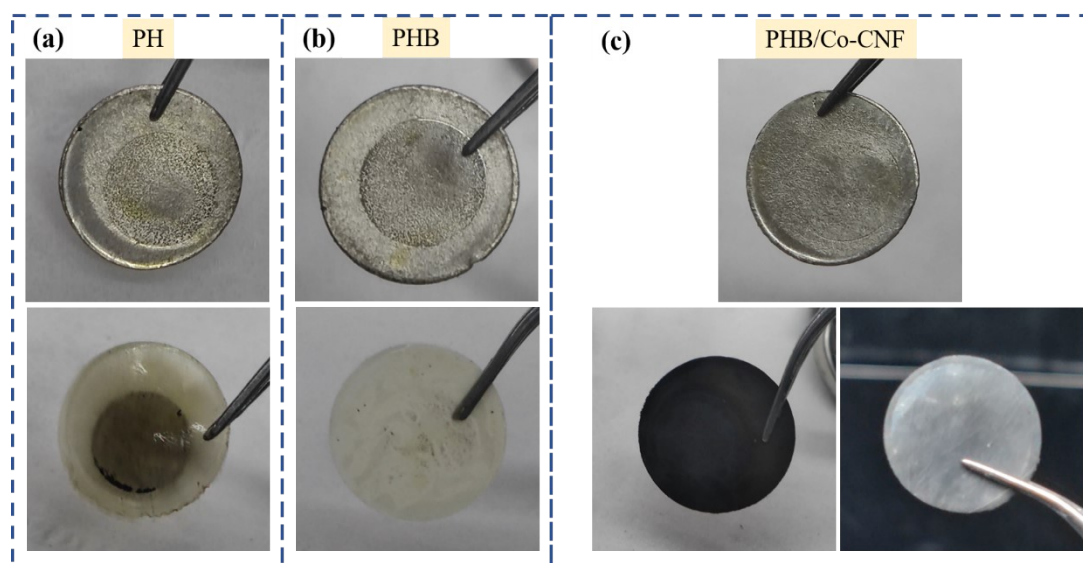

Figure S13. Photographs of the Li anodes and separators of the Li-S batteries with PH, PHB, PHB/Co-CNF separators after 50 cycles.
